# Supplementary material for: Comparative Proteomic Analysis of Coregulation of CIPK14 and WHIRLY1/3 Mediated Pale Yellowing of Leaves in Arabidopsis
Source: PubMed Central journal article supplement (PMC6121582; doi:10.3390/ijms19082231), 2018-07-31
Supplement: ijms-19-02231-s001.pdf [file ijms-19-02231-s001.pdf]

Supplemental Table S1 The list of primer sequences for qRT-PCR

| TAIR number | Gene name | Primer sequences (5' to 3')                                |
|-------------|-----------|------------------------------------------------------------|
| At1g14410   | WHIRLY1   | FP: TTTTACGTGGGTCATTTCGAT<br>RP: GTCCACTGTTAACGCAGCTT      |
| At2g02740   | WHIRLY3   | FP: ACGGTGAAGTCTCGACAAAG<br>RP: ATCGAATGACCCACGTAAAA       |
| AT5G01820   | CIPK14    | FP:TAGACACGAATCCGCAGACGA<br>RP:TCGTTCGTAGCCCTGTTTGAACC     |
| AT1g13440   | GAPC2     | FP:ACCACTGTCCACTCTATCACTGA<br>RP:TGAGGGATGGCAACACTTTCCC    |
| AT3G24430   | spot 1    | FP:CACTTTGACGCTGATGGGAAACG<br>RP:TGCCGAATTGCTTGACCACCTC    |
| AT2G39730   | spot 2    | FP:AGACCGTATCGGTGTCTGCAAG<br>RP:CCCTCAAAGCACCGAAGAAATCG    |
| ATCG00120   | spot 3    | FP:TTCTTCCGTGGCTCAGGTAGTG<br>RP:GGCCGTTTCAGCTACCACAATAG    |
| AT5G45930   | spot 4    | FP:TGTGCTGAGCTGGACGTTGATG<br>RP:AGCGCTCTAGCTGCTCTGTTTATC   |
| AT3G12780   | spot 5    | FP:CGAGCTTCTTGGTATTGAGGTCAC<br>RP:GGTAGAGAAGCCACCAAGCTTTCC |
| AT3G55800   | spot 6    | FP:TCGACAACCTCCGAATACAGCAAGC<br>RP:AACCATTCTCCGGTGTATCGC   |
| AT3G57260   | spot 7    | FP:AGCTTCCTTCTTCAACCACACAGC<br>RP:TGGCAAGGTATCGCCTAGCATC   |
| AT2G37220   | spot 8    | FP:GCTCAGCAGTTCAATGGCTATGAG<br>RP:ACCATCTTCCCTCTTTGGTGGTG  |
| AT5G54770   | spot 9    | FP:TTTCTCCGCCATGATTGTTCGC<br>RP:AAGCCACACCAATCTCGTCAAGG    |
| AT4G08390   | spot 10   | FP:TCTAGGCCAGAACGTAGTGGTTGG<br>RP:TGCTCCAGGTCTTCTTTTCGTG   |
| AT1G09130   | spot 11   | FP:TATGATGCCACATGCCAAAGCG<br>RP:ACATCACTGGCAGGCATCAACC     |
| AT4G10340   | spot 12   | FP:GCCGTAGTTGCTGAGGTTGTTT<br>RP:AGCTTGTCCTCGAAATCCAATCCG   |
| At5g35590   | spot 13   | FP:AGGTCGTCTCTTCCAAGTCGAG<br>RP:TTCTGCGTAACGACGCATACTG     |
| AT1G64510   | spot 15   | FP:CATGTCTGAAGATGAACGGCTTGG<br>RP:TCCTGCCACAAGCAACTCTTCG   |
| AT2G44650   | spot 19   | FP:GGACAACAAGTTGGACCTGGAAAG<br>RP:CATCGGTTCCCAAATCGACCTC   |

| TAIR number | Gene name | Primer sequences (5' to 3')                                |
|-------------|-----------|------------------------------------------------------------|
| AT1G02930   | spot 20   | FP:AAGAGCCTTTCATCCTTCGCAACC<br>RP:TGTCCTTGCCAGTTGAGAGAAGG  |
| AT4G17090   | spot 21   | FP:AAAGCACGGTCTCAAACCTCCAG<br>RP:ACTGCAAGAGTCTCCTACGTTTCC  |
| AT4G13930   | spot 22   | FP:AAAGCCAATGCTGTTGCCCTTG<br>RP:CAGAGCTTCTCAACCTTGTTCCG    |
| AT4G11150   | spot 24   | FP:TGCGCGTCTTGATGTGGCATT<br>RP:GCCGAACAACGACTTACGGATCAC    |
| AT1G07890   | spot 25   | FP:TTCCACCCTGGAAGAGAGGAC<br>RP:TGGTCACAACCCTTGGTAGCATC     |
| AT4G25080   | spot 26   | FP:AGGAGCAATCGTCTCTGCTTCC<br>RP:ATGGTAGTTGTGCCTTTGCCTTC    |
| AT1G77090   | spot 28   | FP:CGAACCTGATGAAGAAGGTTGGAG<br>RP:ACCAAGATCAGCGATCGATACAGG |
| AT4G14800   | spot 29   | FP:GGCGGATACATCAGCAGTTCACAG<br>RP:TCCGTAAACTGAACCCGGTCAC   |
| AT3G63190   | spot 30   | FP:GCGATGCTTGACAAGATTGAGGTG<br>RP:CCGGAGTACTGATTTGGGCTATGC |
| AT4G38740   | spot 31   | FP:AGACGTGGTAAAGGCCATCGAG<br>RP:ATCGGCAACAACCACAGGCTTC     |
| AT4G05180   | spot 33   | FP:ACACCGTTATCTCCGCTAAGCC<br>RP:TGATCTCGCCGCATAGTCCAAG     |
| AT1G79040   | spot 34   | FP:TAACGGCAGCATGGACTTGAGG<br>RP:ACTTGTAACACCGTATCCCTTGC    |
| AT4G01050   | spot 35   | FP:ACCAACCGAAACAGAAGCCAAAC<br>RP:ATGGAGGCTTCAAGTCAGGGTACG  |
| AT3G47520   | spot 36   | FP:GCTCACTGTTAGGATTCAGAACGC<br>RP:AACCTGCACCTGCCTTAGCATC   |
| AT2G38230   | spot 37   | FP:AAGGCGGTGTTGCTCGAATGAG<br>RP:TTTCGCCATCACCGGAATCGTC     |
| AT1G76080   | spot 38   | FP:TTCTTGCTCGTCATGGGTGATG<br>RP:CTGGTCCGGTTCAATACCTTCTTC   |
| AT2G05840   | spot 39   | FP:AGGTCGTCTCTTCCAAGTCGAG<br>RP:TTCTGCGTAACGACGCATACTG     |
| AT2G21660   | spot 44   | FP:TCAATGGCGTCCGGTGATGTTG<br>RP:TCATCAGTGGCCCATGCTAGAC     |
| AT3G01390   | spot 46   | FP:AGAGGAAACTTGAGGAGACAAGC<br>RP:CTTGCTCCAGCCTCTTCACATTCG  |

| TAIR number | Gene name | Primer sequences (5' to 3')                                |
|-------------|-----------|------------------------------------------------------------|
| AT5G11670   | spot 47   | FP:GGACCTCATTGGTGCTGTTAATGC<br>RP:CCACACCGGATGTTCCAATGAG   |
| AT5G65010   | spot 48   | FP:TGTCTTCCCGGATAACACACCTC<br>RP:AGTCGCTCTAGCAGCACTCTTC    |
| AT3G47930   | spot 49   | FP:GGCCACCTAAGGACAAACCAAAG<br>RP:CCTGGACCCTATACTTCACAATGC  |
| AT1G23310   | spot 50   | FP:TTACCAACGGGAGCTCTCCAAG<br>RP:GTTGTCCTCAGATGGAACACACC    |
| AT5G14780   | spot 51   | FP:AAGGAAGGCCCTGATTGCGAAC<br>RP:AAGGGAGTGGAGATTAGGACGTG    |
| AT2G06050   | spot 52   | FP:ACGTGCTTCTCATGCAGTGTATC<br>RP:TACTTCACGTGGGAACCATCGG    |
| AT1G29670   | spot 53   | FP:AGAAGAAACCGGTCGACAATTGGG<br>RP:GCTGCACAACCTTGCGATACTGTG |
| AT4G09010   | spot 54   | FP:GCATATGGTTCAGCTGGTCAGTGG<br>RP:TCAGCCTCTGTTGCATCACTCC   |
| AT2G45820   | spot 55   | FP:TCTGGTTCGGCCGATAGAGATG<br>RP:TTCCCAAGCATGCACATCAGAG     |
| AT2G16600   | spot 56   | FP:ACATGACCGTCGGTGGCAAATC<br>RP:TTCTCGGCGGTTTCTGGTGTTG     |
| AT1G65260   | spot 57   | FP:TCTTGACAGTGAGGCCCTTAAAC<br>RP:TTCAAAGCAGTAGCGTTGTCAGC   |
| AT3G57560   | spot 58   | FP:ATACAGTTGCTGGAGAGCTTGCG<br>RP:TTCCAGCCACATCAGTCAGCAG    |
| AT3G01500   | spot 59   | FP:AGATGCCTTCGTGGTCCGTAAC<br>RP:CAACGCCACCGTATTTGACCTTG    |
| AT1G02920   | spot 60   | FP:AGCCTTTCATCTTCCGCAACCC<br>RP:TTGGAGCCAAGGGAGACAAGTTGG   |
| AT4G25130   | spot 61   | FP:ACTGGCACTACGGGACATAACG<br>RP:ACCCTGACGATTCAAGGTGGTTG    |
| AT1G73230   | spot 62   | FP:ATCAGCCAACTTGGACCAGATAAC<br>RP:ACCTGGAGCTTGTTTCTGGAATTG |
